# Supplementary material
Source: Springer Nature journal article supplement (https://www.springermedizin.de/resource/supplementary/13032_2014_79_MOESM2_ESM.pdf/9651612)
Supplement: MOESM2 [file 9651612]

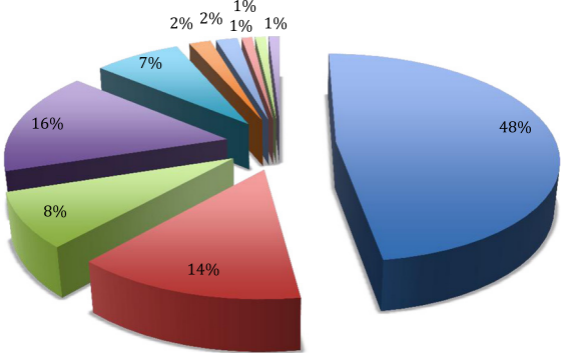

■ Anaesthesiology   
 ■ Surgery   
 ■ Trauma-Surgery   
 ■ Internal Medicine  
■ General Medicine   
 ■ Otolaryngology   
 ■ Cardiology   
 ■ Paediatrics  
■ Neurology   
 ■ Naturopathy
